# Supplementary material for: D-β-aspartyl residue exhibiting uncommon high resistance to spontaneous peptide bond cleavage
Source: PubMed Central journal article supplement (PMC4753488; doi:10.1038/srep21594), 2016-02-15
Supplement: srep21594-s1.pdf [file srep21594-s1.pdf]

D- $\beta$ -aspartyl residue exhibiting uncommon high resistance to spontaneous peptide bond cleavage

*Kenzo Aki and Emiko Okamura*

Supplement

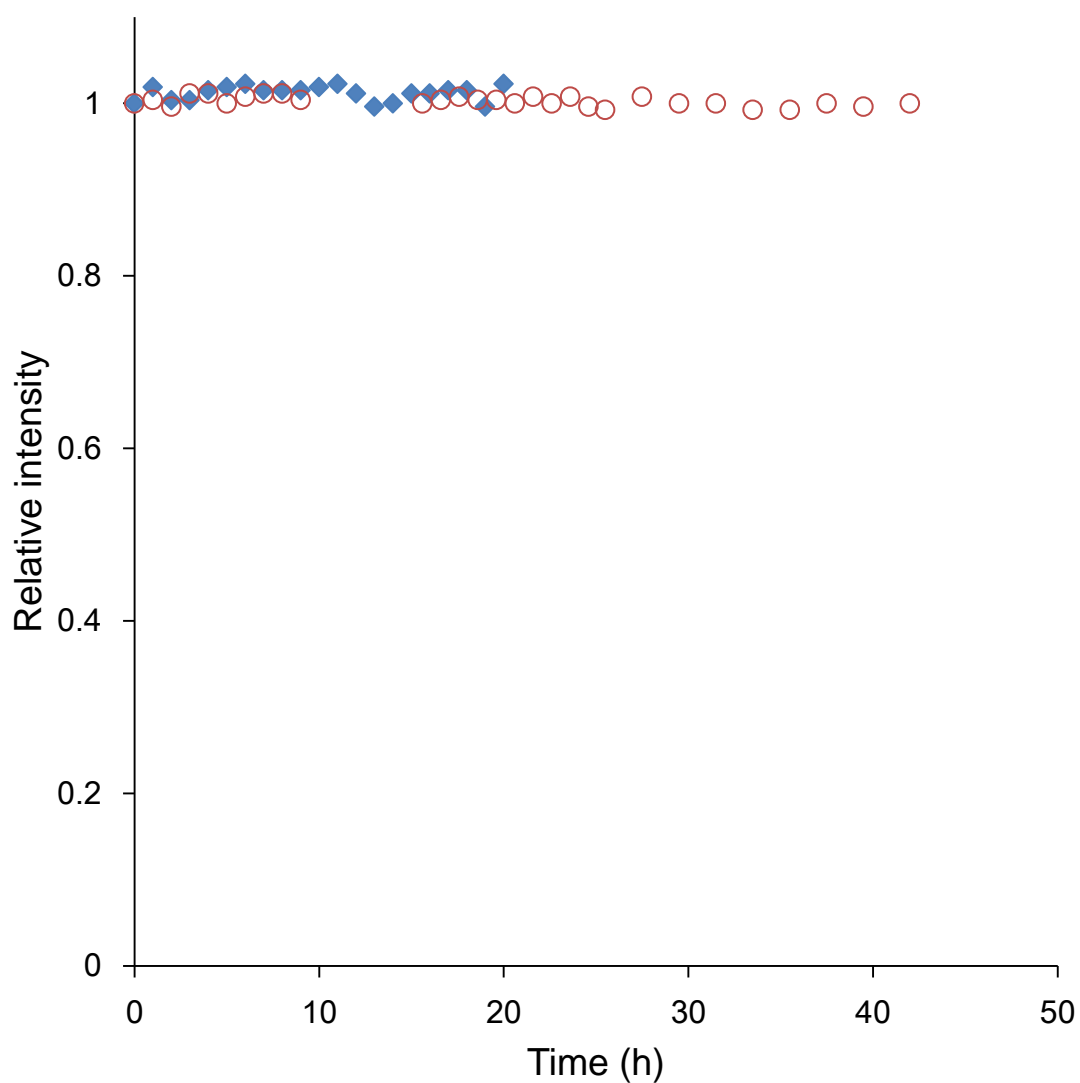

**Figure S1.** Real-time signal intensity change of Phe53 ring proton in  $\alpha$ A-crystallin fragment, S<sup>51</sup>LFRTVLD<sup>58</sup>SG<sup>60</sup> during the bond cleavage reaction at L- $\alpha$ - (◆) and D- $\beta$ -Asp58 (○). The intensities are the ones relative to the initial value at time 0.
